# Supplementary material for: Rapid and ultrasensitive fluorescent screening of extracellular vesicles using dual-aptamer recognition-triggered RCA
Source: Royal Society of Chemistry journal article supplement (doi:10.1039/d5nj00069f), 2025-01-01
Supplement: d5nj00069f1.pdf [file d5nj00069f1.pdf]

## Supporting Information

### Rapid and Ultrasensitive Fluorescent Screening of Extracellular Vesicles Using Dual-Aptamers Recognition-triggered RCA

Rui Zhu,<sup>a†</sup> Jingru Zhu,<sup>a†</sup> Zhiqiang Guo,<sup>c</sup> Qing-ao Pang,<sup>a</sup> Meili Yang,<sup>a</sup> Bowen Li,<sup>a</sup>  
Yijing Xiao,<sup>b</sup> Weiqing Sun,<sup>b</sup> Shenguang Ge,<sup>c</sup> Su Liu,<sup>b</sup> Jiadong Huang,<sup>acd</sup> Yu Wang<sup>ad\*</sup>

<sup>a</sup>School of Biological Sciences and Technology, University of Jinan, Jinan 250022,  
P. R. China. E-mail: bio\_wangy@ujn.edu.cn; Fax: +86-531-82769122;

Tel: +86-531-89736122

<sup>b</sup>School of Water Conservancy and Environment, University of Jinan, Jinan 250022,  
P. R. China

<sup>c</sup>Key Laboratory of Chemical Sensing & Analysis in Universities of Shandong,  
School of Chemistry and Chemical Engineering, University of Jinan, Jinan 250022,  
P. R. China

<sup>d</sup>Jinan Engineering Research Center of Plant-Microbial Interaction, Jinan 250022, P.  
R. China

†These authors contributed equally to this work.

\*Corresponding Author. E-mail: bio\_wangy@ujn.edu.cn; Tel.: +86-531-89736122; Fax: +86-531  
82769122.

## Experiment section

**Materials and Reagents.** All of the oligonucleotide sequences listed in **Table S1** were produced and refined through HPLC by Sangon Biotech Co., Ltd. (Shanghai, China). Tetramethylethylenediamine (TEMED) and ammonium persulfate (AP) were acquired from Sangon Biotech Co., Ltd. (Shanghai, China). Human malignant melanoma cells (A375), Fetal bovine serum (FBS), DMEM basic medium, trypsin, 10×TBE buffer, DNA marker, and Gel Red were received from both Thermo Fisher Scientific (Shanghai, China) and Procell Life Science & Technology Co., Ltd. (Wuhan, China). The enzymes and buffers utilized in the experiment, including Phi29 DNA polymerase, T4 DNA ligase, Escherichia coli exonuclease I (Exo I), Escherichia coli exonuclease III (Exo III), dNTPs, Phi29 buffer, PBS buffer and T4 buffer, were all ordered from New England Biolabs (NEB). The exoEasy Maxi Kit was obtained from QIAGEN (Germany). Dimethyl sulfoxide (DMSO) was purchased from Damao Chemical Reagent Factory (Tianjin, China). Thioflavin T (ThT) was purchased from Sigma-Aldrich (Shanghai, China). Polyacrylamide gel kits and ammonium molybdate staining solution were procured from Solarbio Science & Technology Co., Ltd. (Beijing, China). All water used in the experimental procedures was deionized water (ddH<sub>2</sub>O).

### Table of Content:

1. **Table S1.** Oligonucleotide sequences used in this work.
2. **Table S2.** Comparison of different methods for EVs determination.

**Table S1. Oligonucleotide sequences used in this work.**

| Oligonucleotide name | sequence (5' to 3') description                                                           |
|----------------------|-------------------------------------------------------------------------------------------|
| Apt-L1               | CACCCCACCTCGCTCCCGTGACACTAATGCTATTTTTTTTTT<br>TTTTTCACATGACCCATACCGA                      |
| Apt-L2               | <u>CATAAGACTGGTCATGTGTTTTTTTTTTTTTTTACGGGCCAC</u><br>ATCAACTCATTGATAGACAATGCGTCCACTGCCCCT |
| PL                   | AGTCTTATGCAGCATGGAGGTTTTTCAGCATGGAGGTCGGT<br>ATG                                          |
| LP                   | CATAAGACTCATACCGA                                                                         |

The underlined portions of Apt-L1 and Apt-L2 in the table can form a complete ligation probe to bind with the PL chain, forming a complete rolling circle template; the italicized portion in Apt-L1 can complement the italicized portion in Apt-L2. The LP sequence is an integration of the underlined portions of Apt-L1 and Apt-L2.

**Table S2. Comparison of different methods for EVs determination.**

| Methods               | Detection Range<br>(particles / mL)   | Limit of Detection<br>(particles / mL) | Reference |
|-----------------------|---------------------------------------|----------------------------------------|-----------|
| Fluorescent assay     | $2 \times 10^4 - 2 \times 10^9$       | $2.9 \times 10^3$                      | 1         |
| Electrochemical assay | $2.47 \times 10^8 - 1.23 \times 10^9$ | $9.3 \times 10^7$                      | 2         |
| Colorimetric assay    | $1 \times 10^5 - 1 \times 10^7$       | $4.7 \times 10^4$                      | 3         |
| Fluorescent assay     | $1.75 \times 10^3 - 3.5 \times 10^8$  | $1.02 \times 10^3$                     | 4         |
| Fluorescent assay     | $10^4 - 10^8$                         | $1.4 \times 10^3$                      | 5         |
| Fluorescent assay     | $1 \times 10^3 - 1 \times 10^{10}$    | $7.64 \times 10^2$                     | This work |

## References

1. G. J. Yang, Z. Y. Li, R. Usman, Z. Chen, Y. Liu, S. Li, H. Chen, Y. Deng, Y. L. Fang and N. Y. He, *CHINESE CHEMICAL LETTERS*, 2025, **36**.
2. S. Kasetirikul, K. T. Tran, K. Clack, N. Soda, M. J. A. Shiddiky and N. T. Nguyen, *ANALYST*, 2022, **147**, 3732-3740.
3. L. Zhao, J. Kuang, K. Xiang, J. Gan, Y. Zeng, X. Zhang, Y. Yan, M. Zhang, H. Zhang and P. Hu, *Talanta*, 2024, **285**, 127380-127380.
4. W. Q. Tan, C. L. Zhang, S. S. Cheng, X. Y. Hu, M. Wang and Y. Z. Xian, *ANALYTICAL CHEMISTRY*, 2024, **96**, 1328-1335.
5. M. C. Gu, H. L. Zhang, Y. Y. Liu, X. R. Li, M. Lv, J. A. Zhao and J. L. Zhang, *ANALYTICA CHIMICA ACTA*, 2024, **1314**.
